# Supplementary material for: Anti-Rheumatoid Arthritis Pharmacodynamic Substances Screening of Periploca forrestii Schltr.: Component Analyses In Vitro and In Vivo Combined with Multi-Technical Metabolomics
Source: MDPI journal article supplement (doi:10.3390/ijms241813695), 2023-09-05
Supplement: s1 [file s1]

**Table S1.** Component identification *in vitro* and *in vivo* of *P. forrestii* Schltr using UHPLC/Q Exactive Plus high-resolution mass spectrum.

| No  | Type                 | Name                     | Formula                                         | Calc. MW  | RT [min]             | MS1                          | MS2                                                                                   | mz<br>Cloud        | Confid<br>ence    | mz<br>Vault        |
|-----|----------------------|--------------------------|-------------------------------------------------|-----------|----------------------|------------------------------|---------------------------------------------------------------------------------------|--------------------|-------------------|--------------------|
| 1   | Organic acid         | Quinic acid              | C <sub>7</sub> H <sub>12</sub> O <sub>6</sub>   | 192.06272 | 1.29                 | (-)191.05540                 | (-)173.04471, 155.03459, 127.03892,<br>111.04396, 93.03327, 85.02821                  | 98.4               | 97.1              | 93.2               |
| 2 & | Phenolic<br>acid     | Protocatechuic<br>acid   | C <sub>7</sub> H <sub>6</sub> O <sub>4</sub>    | 154.02572 | 5.03                 | (-)153.01840                 | (-)109.02832                                                                          | 92.1               | 9.6               | 99.3               |
| 3 & | Phenolic<br>acid     | Neochlorogenic<br>acid   | C <sub>16</sub> H <sub>18</sub> O <sub>9</sub>  | 354.09552 | 7.84                 | (-)353.08820                 | (-)191.05554, 179.03432, 135.04414                                                    | 96.4               | 63.8              | 89.9               |
| 4   | Phenolic<br>aldehyde | Protocatechualde<br>hyde | C <sub>7</sub> H <sub>6</sub> O <sub>3</sub>    | 138.03242 | (+)8.16<br>(-)8.17   | (+)139.03973<br>(-)137.02350 | (+)111.04478, 93.03434;<br>(-)109.02855                                               | (+)73.5<br>(-)95.8 | (+)52.9<br>(-)9.8 | (+)86.6<br>(-)90.1 |
| 5   | Coumarin             | Esculin                  | C <sub>15</sub> H <sub>16</sub> O <sub>9</sub>  | 340.08009 | 9.77                 | (-)339.07275                 | (-)177.01868, 133.02846, 105.03363,<br>89.03883                                       | 98.1               | 9.9               | 92.1               |
| 6   | Alkaloid             | Sinomenine               | C <sub>19</sub> H <sub>23</sub> NO <sub>4</sub> | 329.16399 | 10.75                | (+)330.17130                 | (+)239.07115, 223.07617, 207.04497,<br>195.08122, 181.06546, 153.07048,<br>137.06029  | 97.9               | 98.1              | 88.7               |
| 7   | Flavanol             | Catechin                 | C <sub>15</sub> H <sub>14</sub> O <sub>6</sub>  | 290.07964 | 11.28                | (-)289.07227                 | (-)245.08191, 205.05022, 179.03426,<br>151.03918, 137.02341                           | 95.1               | 100               | 94.6               |
| 8 & | Coumarin             | Esculetin                | C <sub>9</sub> H <sub>6</sub> O <sub>4</sub>    | 178.02720 | (+)11.93<br>(-)11.94 | (+)179.03439<br>(-)177.01860 | (+)151.03946, 133.02885, 123.04458,<br>105.03421<br>(-)133.02840, 105.03336, 89.03838 | (+)98.2            | (+)92.4           | (+)93.6<br>(-)98.3 |
| 9 & | Phenolic<br>acid     | Chlorogenic acid         | C <sub>16</sub> H <sub>18</sub> O <sub>9</sub>  | 354.09555 | 12.45                | (-)353.08820                 | (-)191.05551, 161.02370, 127.03906,<br>111.04388, 93.03339, 85.02825                  | 99.1               | 75.8              | 95.8               |
| 10  | Organic acid         | Caffeic acid             | C <sub>9</sub> H <sub>8</sub> O <sub>4</sub>    | 180.04161 | 12.68                | (-)179.03420                 | (-)135.04407, 117.03342, 107.04914                                                    | 98.9               | 9.9               | 95.1               |
| 11  | Organic acid         | 3-Feruloylquinic         | C <sub>17</sub> H <sub>20</sub> O <sub>9</sub>  | 368.11092 | 13.02                | (-)367.10400                 | (-)193.05006, 134.03630                                                               |                    |                   | 90                 |

|      |                   | Acid                   |                                                 |           |                      |                              |                                                                                |      |      |                    |
|------|-------------------|------------------------|-------------------------------------------------|-----------|----------------------|------------------------------|--------------------------------------------------------------------------------|------|------|--------------------|
| 12 & | Phenolic acid     | Cryptochlorogenic acid | C <sub>16</sub> H <sub>18</sub> O <sub>9</sub>  | 354.09508 | 13.57                | (-)353.08826                 | (-)191.05562, 179.03436, 173.04488, 135.04419                                  | 89.6 | 51.2 | 94.3               |
| 13 & | Coumarin          | Fraxin                 | C <sub>16</sub> H <sub>18</sub> O <sub>10</sub> | 370.09046 | 14.68                | (-)369.08307                 | (-)207.02940, 192.00572                                                        | 98.3 | 96.6 | 94.5               |
| 14 & | Alkaloid          | Magnoflorine           | C <sub>20</sub> H <sub>23</sub> NO <sub>4</sub> | 341.16444 | 15.09                | (+)342.17178                 | (+)297.11307, 282.08951, 265.08670, 237.09177                                  |      |      | 88.5               |
| 15 & | Phenolic aldehyde | Vanillin               | C <sub>8</sub> H <sub>8</sub> O <sub>3</sub>    | 152.04790 | 15.13                | (+)153.05551                 | (+)125.06036, 111.04482, 93.03439, 65.03963                                    | 95.4 | 86   | 90.8               |
| 16   | Coumarin          | Epicatechin            | C <sub>15</sub> H <sub>14</sub> O <sub>6</sub>  | 290.07954 | 16.13                | (-)289.07200                 | (-)245.08200, 203.07095, 179.03435, 151.03928, 137.02347, 123.04409, 109.02840 | 95.8 | 100  | 94.5               |
| 17 & | Coumarin          | Fraxetin               | C <sub>10</sub> H <sub>8</sub> O <sub>5</sub>   | 208.03784 | 16.28                | (+)209.04509                 | (+)194.02164, 163.03951, 153.05516, 149.02390, 135.04459, 121.02907, 107.04988 | 98   | 98.4 | 94.9               |
| 18   | Phenolic acid     | Ethyl gallate          | C <sub>9</sub> H <sub>10</sub> O <sub>5</sub>   | 198.05225 | 17.55                | (-)197.04497                 | (-)168.00545, 140.01039, 125.02325                                             |      |      | 74.1               |
| 19 & | Phenolic acid     | Isochlorogenic acid A  | C <sub>25</sub> H <sub>24</sub> O <sub>12</sub> | 516.12770 | 17.60                | (-)515.12042                 | (-)353.08807, 191.05545, 179.03424, 1353.04408                                 | 76.6 | 67.5 | 91.9               |
| 20   | Flavone           | Syrangaldehyde         | C <sub>9</sub> H <sub>10</sub> O <sub>4</sub>   | 182.05867 | (+)17.69<br>(-)17.62 | (+)183.06595<br>(-)181.05003 | (+)140.04710, 123.04449, 95.04984; (-)166.02634, 151.00278, 123.00765          |      |      | (+)88.3<br>(-)95.4 |
| 21   | Phenolic acid     | Sinapinic acid         | C <sub>11</sub> H <sub>12</sub> O <sub>5</sub>  | 224.06884 | 19.03                | (+)225.07637                 | (+)207.06573, 175.03944, 147.04443, 119.04971, 91.05500                        | 97.6 | 96.5 | 89.0               |
| 22   | Fatty acid        | Jasmonic acid          | C <sub>12</sub> H <sub>18</sub> O <sub>3</sub>  | 210.12347 | 19.04                | (+)211.13077                 | (+)193.12285, 151.11229, 147.11694, 137.05998, 133.10162                       | 90.8 | 82.7 |                    |
| 23   | Coumarin          | Scopoletin             | C <sub>10</sub> H <sub>8</sub> O <sub>4</sub>   | 192.04305 | 19.27                | (+)193.05042                 | (+)178.02640, 133.02876                                                        | 98.6 | 94.3 | 93.5               |

|      |                  |                                  |                                                 |           |                      |                              |                                                                                                                        |                    |                    |                  |
|------|------------------|----------------------------------|-------------------------------------------------|-----------|----------------------|------------------------------|------------------------------------------------------------------------------------------------------------------------|--------------------|--------------------|------------------|
| 24   | Phenolics        | Procyanidin A1                   | C <sub>30</sub> H <sub>24</sub> O <sub>12</sub> | 576.12778 | 20.20                | (-)575.12006                 | (-)449.08823, 423.07236, 285.04050,<br>125.02324                                                                       |                    |                    | 85.3             |
| 25   | Flavone          | Orientin                         | C <sub>21</sub> H <sub>20</sub> O <sub>11</sub> | 448.10195 | 21.30                | (-)447.09457                 | (-)357.06210, 327.05142, 299.05627,<br>133.02855                                                                       | 97.5               | 100                | 90.9             |
| 26   | Flavone          | Piceid                           | C <sub>20</sub> H <sub>22</sub> O <sub>8</sub>  | 390.13270 | 21.58                | (-)389.12549                 | (-)227.07104, 185.06003, 143.04924                                                                                     |                    |                    | 95.5             |
| 27   | Phenolic<br>acid | Salicylic acid                   | C <sub>7</sub> H <sub>6</sub> O <sub>3</sub>    | 138.03078 | 21.71                | (-)137.02350                 | (-)93.03333, 65.03837                                                                                                  | 99.4               | 10                 | 98.8             |
| 28   | Flavone          | Procyanidin A2                   | C <sub>30</sub> H <sub>24</sub> O <sub>12</sub> | 576.12797 | 21.97                | (+)577.13647                 | (+)437.08768, 425.08755, 287.05554,<br>137.02380                                                                       |                    |                    | 87               |
| 29 & | Flavone          | Myricitrin                       | C <sub>21</sub> H <sub>20</sub> O <sub>12</sub> | 464.09602 | 21.97                | (-)463.08871                 | (-)316.02261, 287.02002, 271.02505,<br>214.02669, 178.99792                                                            | 97.4               | 100                | 95.9             |
| 30   | Phenolic<br>acid | Ferulic acid                     | C <sub>10</sub> H <sub>10</sub> O <sub>4</sub>  | 194.05791 | 22.00                | (-)193.05020                 | (-)178.02655, 135.03957, 134.03635                                                                                     | 98.0               | 95.0               | 93.4             |
| 31 & | Flavone          | Quercitrin                       | C <sub>21</sub> H <sub>20</sub> O <sub>11</sub> | 448.10201 | 22.04                | (+)449.10962                 | (+)303.05072, 229.05016, 153.01884,<br>129.05518                                                                       | 97.9               | 81.7               | 89.2             |
| 32 & | Flavone          | Rutin                            | C <sub>27</sub> H <sub>30</sub> O <sub>16</sub> | 610.15426 | 22.07                | (+)611.16150                 | (+)303.05078, 257.04456, 229.05042,<br>201.05557, 165.01855, 153.01888,<br>137.02388, 129.05519, 85.02931,<br>71.05016 | 99.2               | 89.6               | 94.8             |
| 33   | Phenolic<br>acid | 4,5-<br>Diferuloylquinic<br>Acid | C <sub>27</sub> H <sub>28</sub> O <sub>12</sub> | 544.15920 | 22.15                | (-)543.15192                 | (-)367.10358, 349.09320, 193.05002,<br>163.03923, 134.03629                                                            |                    |                    | 61.6             |
| 34 & | Phenolic<br>acid | Isochlorogenic<br>Acid B         | C <sub>25</sub> H <sub>24</sub> O <sub>12</sub> | 516.12750 | (+)22.24<br>(-)22.26 | (+)499.12531<br>(-)515.12061 | (+)319.08200, 163.03938, 145.02890,<br>135.04453, 117.03413, 89.03941<br>(-)353.08801, 191.05547, 179.03423,           | (+)98.8<br>(-)88.4 | (+)85.8<br>(-)72.7 | (+)93<br>(-)90.8 |

|      |                   |                       |                                                 |           |                      |                              |                                                                                     |      |      |      |
|------|-------------------|-----------------------|-------------------------------------------------|-----------|----------------------|------------------------------|-------------------------------------------------------------------------------------|------|------|------|
|      |                   |                       |                                                 |           |                      |                              | 173.04474, 1353.04408                                                               |      |      |      |
| 35   | Alkaloid          | Berberine             | C <sub>20</sub> H <sub>17</sub> NO <sub>4</sub> | 335.11712 | 22.28                | (+)336.12436                 | (+)320.09265, 306.07690, 292.09763, 278.08194                                       | 96.5 | 9.8  | 93.5 |
| 36 & | Phenolic acid     | Isochlorogenic acid C | C <sub>25</sub> H <sub>24</sub> O <sub>12</sub> | 516.12739 | 22.47                | (-)515.12006                 | (-)353.08813, 191.05554, 179.03432, 173.04480, 135.04413                            | 97.4 | 92.7 | 91.4 |
| 37 & | Polyphenol        | Resveratrol           | C <sub>14</sub> H <sub>12</sub> O <sub>3</sub>  | 228.07923 | 22.54                | (+)229.08655                 | (+)211.07579, 183.08089, 165.07030, 135.04443, 119.04966, 107.04977, 91.05499       | 99.2 | 96.3 | 94.6 |
| 38   | Flavone           | Afzelin               | C <sub>21</sub> H <sub>20</sub> O <sub>10</sub> | 432.10650 | 22.74                | (-)431.09952                 | (-)285.04047, 255.02994, 227.03474                                                  | 98.6 | 70.7 | 96.6 |
| 39   | Flavone           | Daidzein              | C <sub>15</sub> H <sub>10</sub> O <sub>4</sub>  | 254.05868 | 22.90                | (+)255.06604                 | (+)224.04762, 209.06090, 197.06017, 180.05731, 135.00769, 133.02850                 | 95.0 | 9.8  | 76.6 |
| 40   | Flavone           | Quercetin             | C <sub>15</sub> H <sub>10</sub> O <sub>7</sub>  | 302.04285 | 22.99                | (-)301.03555                 | (-)273.04065, 245.04573, 178.99800, 151.00284, 121.02845, 107.01275                 | 98.2 | 94.4 | 94.9 |
| 41 & | Cardiac glycoside | Periplocoside         | C <sub>36</sub> H <sub>56</sub> O <sub>13</sub> | 696.37264 | (+)22.78<br>(-)22.80 | (+)697.37823<br>(-)695.36658 | (+)571.16534, 511.14429, 329.15793, 207.06596<br>(-)452.64120, 353.08826, 191.05559 |      |      | 86.0 |

Note: & means the component was absorbed into the blood and confirmed using standards.

**Table S2.** Target genes for 17 blood absorbing components in rats (a total of 574).

|         |         |         |         |        |        |         |         |         |         |
|---------|---------|---------|---------|--------|--------|---------|---------|---------|---------|
| ABAT    | ABCB1   | ABCC1   | ABCG2   | ABL1   | ACE    | ACE2    | ACHE    | ACLY    | ACP1    |
| ADA     | ADAM17  | ADAMTS4 | ADAMTS5 | ADCY5  | ADK    | ADORA1  | ADORA2A | ADORA2B | ADORA3  |
| ADRA1A  | ADRA1B  | ADRA1D  | ADRA2A  | ADRA2B | ADRA2C | ADRB1   | ADRB2   | AGTR1   | AHCY    |
| AHR     | AKR1A1  | AKR1B1  | AKR1B10 | AKR1C1 | AKR1C2 | AKR1C3  | AKR1C4  | AKT1    | ALB     |
| ALDH1A1 | ALDH2   | ALDH5A1 | ALK     | ALOX12 | ALOX15 | ALOX5   | ALPG    | ALPL    | AMD1    |
| AMPD3   | AMY2A   | ANPEP   | AOC3    | APEX1  | APH1A  | APH1B   | APP     | AR      | ASF1A   |
| ATIC    | ATP12A  | ATP1A1  | AURKA   | AURKB  | AVPR2  | AXL     | BACE1   | BCHE    | BCL2    |
| BCL2L1  | BMP1    | BRAF    | BTK     | CA1    | CA12   | CA13    | CA14    | CA2     | CA3     |
| CA4     | CA5A    | CA5B    | CA6     | CA7    | CA9    | CALM1   | CAMK2B  | CAPN1   | CASP1   |
| CASP2   | CASP3   | CASP6   | CASP7   | CASP8  | CBR1   | CCNA1   | CCNA1   | CCNA2   | CCNB1   |
| CCNB2   | CCNB3   | CCND1   | CCND1   | CCNE1  | CCNE2  | CCNT1   | CD22    | CD38    | CDA     |
| CDC25A  | CDC25B  | CDC7    | CDK1    | CDK1   | CDK2   | CDK2    | CDK4    | CDK5    | CDK5R1  |
| CDK9    | CDK9    | CES1    | CFTR    | CHEK1  | CHEK2  | CHRM1   | CHRNA4  | CHRNA7  | CHRNA7  |
| CISD1   | CLK1    | CLK3    | CMA1    | CNR1   | CNR2   | COMT    | CSF1R   | CSNK1A1 | CSNK1D  |
| CSNK2A1 | CSNK2A2 | CTBP2   | CTSB    | CTSD   | CTSL   | CTSV    | CXCR1   | CXCR2   | CYP11B1 |
| CYP11B2 | CYP17A1 | CYP19A1 | CYP1A1  | CYP1A2 | CYP1B1 | CYP2C19 | CYP2C9  | CYP3A4  | DAO     |
| DAPK1   | DAPK3   | DBF4    | DHFR    | DHODH  | DNM2   | DNMT1   | DNMT3B  | DOT1L   | DPP4    |
| DRD1    | DRD2    | DRD3    | DRD4    | DRD5   | DTYMK  | DUSP1   | DUSP3   | DYRK1A  | DYRK1B  |
| DYRK2   | ECE1    | EDNRA   | EGFR    | EGLN1  | ELANE  | ENGASE  | ENPEP   | EP300   | EPHA2   |
| EPHB4   | EPHX2   | ERAP2   | ERBB2   | ERN1   | ESR1   | ESR2    | ESRRA   | ESRRB   | F10     |
| F2      | F2RL1   | F3      | F7      | FABP4  | FAP    | FASN    | FBP1    | FFAR1   | FGFR1   |
| FGR     | FLT3    | FLT4    | FOLH1   | FPGS   | FTO    | FUCA1   | FUT7    | FYN     | GAA     |
| GABRA1  | GABRA5  | GAPDH   | GART    | GBA    | GBA2   | GGH     | GLB1    | GLI1    | GLO1    |
| GLRA1   | GLRA2   | GNPAT   | GPR35   | GPR84  | GRB2   | GRIA2   | GRIK2   | GRIK3   | GRK1    |

|         |         |         |         |          |         |         |          |          |        |
|---------|---------|---------|---------|----------|---------|---------|----------|----------|--------|
| GRK6    | GRM2    | GRM5    | GSK3B   | GSR      | HCAR2   | HCK     | HDAC2    | HDAC3    | HDAC5  |
| HDAC6   | HDAC7   | HDAC8   | HK1     | HK2      | HMGCR   | HMOX1   | HPGD     | HPRT1    | HRAS   |
| HRH2    | HSD11B1 | HSD11B2 | HSD17B1 | HSD17B14 | HSD17B2 | HSD17B3 | HSP90AA1 | HSP90AB1 | HSPA1A |
| HSPA5   | HSPA8   | HTR1A   | HTR1B   | HTR1D    | HTR2A   | HTR2B   | HTR2C    | HTR3A    | HTR5A  |
| HTR6    | HTR7    | IARS    | ICAM1   | ICAM1    | IDO1    | IGF1R   | IGFBP3   | IKBKB    | IKBKE  |
| IL2     | IMPDH1  | IMPDH2  | INMT    | INSR     | IRAK4   | ITGA2B  | ITGA4    | ITGA5    | ITGAL  |
| ITGAL   | ITGAL   | ITGAV   | ITGB1   | ITGB1    | ITGB2   | ITGB3   | ITGB6    | ITGB7    | JAK3   |
| KAT2B   | KCNA3   | KCNA5   | KCNH2   | KCNMA1   | KDM2A   | KDM3A   | KDM4A    | KDM4B    | KDM4C  |
| KDM4D   | KDM4E   | KDM5B   | KDM5C   | KDR      | KIF11   | KISS1R  | KIT      | KMT2A    | LAP3   |
| LARS    | LCK     | LCT     | LDHA    | LDHB     | LGALS3  | LGALS7  | LGALS9   | LIMK1    | LRRK2  |
| LTB4R   | LYN     | MAG     | MANBA   | MAOA     | MAOB    | MAP2K1  | MAP3K14  | MAP3K8   | MAP3K9 |
| MAPK1   | MAPK14  | MAPK8   | MAPK9   | MAPKAPK2 | MAPT    | MB      | MCHR1    | MCL1     | MET    |
| METAP1  | METAP2  | MGAM    | MGLL    | MIF      | MKNK1   | MME     | MMP1     | MMP10    | MMP12  |
| MMP13   | MMP14   | MMP16   | MMP2    | MMP3     | MMP7    | MMP8    | MMP9     | MPO      | MTOR   |
| MYLK    | NAALAD2 | NAT1    | NCSTN   | NEK2     | NEU2    | NEU3    | NEU4     | NFKB1    | NGFR   |
| NMUR2   | NOS1    | NOS2    | NOS3    | NOX4     | NPC1L1  | NQO1    | NQO2     | NR3C2    | NR4A1  |
| NRP1    | NUAK1   | OGA     | OPRM1   | P2RY1    | P2RY6   | P4HTM   | PADI1    | PADI2    | PADI3  |
| PADI4   | PARP1   | PDE1B   | PDE4B   | PDE4D    | PDE5A   | PDE9A   | PDGFRA   | PDGFRB   | PDPK1  |
| PFKFB3  | PGR     | PHF8    | PI4KB   | PIK3CA   | PIK3CB  | PIK3CD  | PIK3CG   | PIK3R1   | PIM1   |
| PIM3    | PIN1    | PKN1    | PLA2G1B | PLA2G4B  | PLAA    | PLAT    | PLEC     | PLG      | PLK1   |
| PLK4    | PNP     | POLA1   | POLB    | PON1     | PPARG   | PPP2CA  | PPP5C    | PREP     | PRKACA |
| PRKCA   | PRKCB   | PRKCD   | PRKCE   | PRKCG    | PRKCH   | PRKCQ   | PRKCZ    | PRKD1    | PRKD2  |
| PRKDC   | PRSS1   | PSEN1   | PSEN2   | PSENEN   | PSMB5   | PTAFR   | PTGDR2   | PTGES    | PTGFR  |
| PTGS1   | PTGS2   | PTK2    | PTK2B   | PTPN1    | PTPN2   | PTPN22  | PTPRA    | PTPRB    | PTPRC  |
| PTPRCAP | PYGL    | PYGM    | QDPR    | RAF1     | RARA    | RARB    | RARG     | RBP4     | RELA   |

|          |         |         |        |          |         |        |        |         |        |
|----------|---------|---------|--------|----------|---------|--------|--------|---------|--------|
| REN      | RET     | RNASEH1 | RORC   | RPS6KA3  | RPS6KB1 | RXRA   | RXRB   | RXRG    | S1PR1  |
| S1PR3    | SELE    | SELL    | SELP   | SERPINE1 | SF3B3   | SHBG   | SI     | SIGMAR1 | SIRT2  |
| SLC13A5  | SLC29A1 | SLC37A4 | SLC5A1 | SLC5A2   | SLC6A2  | SLC6A3 | SLC6A4 | SLC8A1  | SLC9A1 |
| SMYD2    | SNCA    | SQLE    | SRC    | SRD5A1   | SRD5A2  | STAT3  | STS    | SUV39H1 | SYK    |
| TACR2    | TBK1    | TBXAS1  | TDP1   | TEK      | TERT    | TGM2   | TH     | TK1     | TLR4   |
| TMPRSS15 | TNF     | TNIK    | TNNC1  | TNNC1    | TNNI3   | TNNT2  | TNNT2  | TOP1    | TOP2A  |
| TP53     | TPMT    | TREH    | TRPC3  | TRPC6    | TRPM8   | TRPV1  | TSPO   | TTL     | TTR    |
| TUBB1    | TUBB3   | TYMP    | TYMS   | TYR      | UGCG    | UPP1   | VAR5   | VCAM1   | VCP    |
| WEE1     | XDH     | YARS    | YWHAG  |          |         |        |        |         |        |

**Table S3.** Related targets for rheumatoid arthritis (a total of 678).

|         |         |         |        |        |        |         |        |         |        |
|---------|---------|---------|--------|--------|--------|---------|--------|---------|--------|
| 1C7     | 6S2650E | ABCG2   | ABCG8  | ABCP   | ABS    | ACAN    | ACP5   | ACSTD1  | ACT1   |
| ADAM17  | ADAMTS4 | ADH1C   | ADH3   | ADMIO2 | AGM1   | AGM7    | AGS1   | AGS2    | AGS4   |
| AGXT    | AHUS3   | AIEFL   | AIFEC  | AILIM  | AILJK  | AIS5    | AKU    | ALB     | ALCAM  |
| ALDD    | ALPL    | ALPS1B  | ALPS2  | ALPS3  | ALPS5  | AMPD1   | ANGPT1 | ANK     | ANKH   |
| ANKRD55 | ANXA1   | AORF    | APCS   | APO2L  | APOH   | APT1LG1 | ARCND3 | ARMD13  | ARMD14 |
| ASRT7   | ATPLS   | B144    | BACH2  | BACTS2 | BCRP   | BGLAP   | BMP6   | BST1    | BTNL2  |
| C1QA    | C1QB    | C1QC    | C1QG   | C2     | C3BR   | C4A     | C4B    | C4BD    | C4F    |
| C5orf30 | C6      | C6orf4  | C6orf5 | C6orf6 | C8B    | CACP    | CAGA   | CAGB    | CANDF7 |
| CANDF8  | CARD12  | CARD14  | CARD8  | CASP10 | CAST   | CAT     | CCA    | CCAL2   | CCCKR5 |
| CCL2    | CCL20   | CCL3    | CCL4   | CCL5   | CCR1   | CCR2    | CCR5   | CCR6    | CCR7   |
| CD137   | CD150   | CD16    | CD244  | CD247  | CD28   | CD32    | CD4    | CD40    | CD40LG |
| CD44    | CD64    | CD69    | CD79A  | CD80   | CD86   | CDC4L   | CDCP1  | CDKN1A  | CDW150 |
| CELIAC1 | CELIAC3 | CELIAC6 | CFAG   | CFI    | CHI3L1 | CIA51   | CIITA  | CIP1    | CIP2A  |
| CISH    | CLAN    | CLCNKB  | CLDN16 | CMDJ   | CMKBR2 | CMKBR5  | CMP    | COL11A1 | COL2A1 |

|          |          |         |         |          |          |          |          |         |          |
|----------|----------|---------|---------|----------|----------|----------|----------|---------|----------|
| COL3A1   | COMP     | COPA    | CPPDD   | CR1      | CRISP3   | CRP      | CRTM     | CRV     | CSF1     |
| CSF1R    | CSF2     | CSIF    | CTLA4   | CTLA8    | CTSK     | CTSL     | CVID1    | CVID12  | CVID8    |
| CVID9    | CXCL1    | CXCL10  | CXCL12  | CXCL2    | CXCL5    | CXCL6    | CXCL8    | CXCL9   | CXCR3    |
| CXCR4    | D6S231E  | D6S49E  | DDH2    | DDX39B   | DDX41    | DEF6     | DEK      | DFNA34  | DFNA37   |
| DIAR5    | DIRA     | DMRV    | DR3     | EDM5     | EDN1     | EDSCLL1  | EDSVASC  | EEF1A1  | EF1A     |
| ELANE    | EOMD     | EPCAM   | ERAP1   | ERG25    | F2RL1    | FAS      | FASL     | FASLG   | FBN2     |
| FCAS1    | FCAS4    | FCGR1A  | FCGR2A  | FCGR2B   | FCGR3A   | FCGR3B   | FCRH3    | FCRL3   | FCU      |
| FI       | FKHRL1   | FL1     | FLG     | FLT1     | FN       | FN1      | FNZ      | FOS     | FOXO3    |
| FOXO3A   | FOXP3    | FRP     | FRZB    | FRZB1    | FSTL1    | FTDALS3  | GALNT3   | GBA     | GBD4     |
| GCP372   | GFI1     | GFND2   | GOLGB1  | GOUT1    | GP39     | GP5      | GPA      | GPI     | GPR11    |
| GPSM3    | GRB1     | GURDP   | GVHDS   | HANK     | HAPO     | HCP5     | HD       | HDLCQ7  | HERNS    |
| HFE      | HFE1     | HFE2A   | HFTC1   | HGD      | HHS      | HIES4    | HJCYS    | HJV     | HLA-B    |
| HLA-C    | HLA-DMA  | HLA-DMB | HLA-DOA | HLA-DPB1 | HLA-DQA1 | HLA-DQA2 | HLA-DQB1 | HLA-DRA | HLA-DRB1 |
| HLA-DRB5 | HLA-G    | HLA-H   | HMGB1   | HNPPC8   | HOA      | HOMG3    | HOPS     | HOX4D   | HOXD10   |
| HP       | HPGD     | HRG     | HSPA5   | HSPD1    | HSR      | HTT      | IBD17    | IBD19   | IBP      |
| ICAM1    | ICOS     | IDDM1   | IDDM12  | IDDM22   | IDDM7    | IFI1     | IFI41    | IFI75   | IFNB1    |
| IFNG     | IGAD1    | IGES    | IGFR1   | IGFR2    | IGFR3    | IGKC     | IGKCD    | IL10    | IL10RA   |
| IL11     | IL12A    | IL12B   | IL13    | IL15     | IL17     | IL17A    | IL17B    | IL17RA  | IL18     |
| IL19     | IL1A     | IL1B    | IL1R1   | IL1RAPL2 | IL1RL1   | IL1RN    | IL2      | IL22    | IL23A    |
| IL23R    | IL2RA    | IL2RB   | IL3     | IL37     | IL4      | IL6      | IL6R     | IL6ST   | IL7      |
| ILA      | ILDR2    | IMD20   | IMD23   | IMD29    | IMD31A   | IMD31B   | IMD31C   | IMD36   | IMD42    |
| IMD48    | IMD57    | IMD60   | IMD68   | IMDSHY   | IPAF     | IRF1     | IRF2     | IRF5    | IRGM     |
| IT15     | ITGA1    | ITGAL   | ITGAM   | ITGB2    | ITPR3    | JNK2     | JUN      | KCNJ13  | KEFH     |
| KIAA1524 | KIAA2025 | LACC1   | LAF4    | LARD     | LBA      | LCA16    | LETS     | LMBD1   | LMBRD1   |
| LMP2     | LMP7     | LOMARS  | LRBA    | LRG47    | LST1     | LTA      | LTB      | LYP     | M4S1     |



|          |           |          |          |          |         |         |          |           |           |
|----------|-----------|----------|----------|----------|---------|---------|----------|-----------|-----------|
| MACIR    | MAFB      | MALS     | MAN2B2   | MAP3K2   | MAPK1   | MAPK14  | MAPK8    | MAPK9     | MAPKAPK2  |
| MAR      | MATN1     | MATN3    | MBL2     | MCCPD    | MCH4    | MEFV    | MEKK2    | MERTK     | MIC18     |
| MICA     | MICB      | MIF      | MIR132   | MIR146A  | MIR150  | MIR155  | MIR198   | MK2       | MMACHC    |
| MMDD     | MMP1      | MMP12    | MMP13    | MMP2     | MMP3    | MMP8    | MMP9     | MOM1      | MOX2      |
| MPLPF    | MPO       | MPYS     | MSF      | MSMO1    | MTHFR   | MVCD1   | MVCD4    | MVCD7     | MVK       |
| MYD88    | MYD88D    | NADGP    | NAIL     | NALP3    | NCR3    | NESI    | NFKB1    | NFKBIA    | NFKBIL1   |
| NISBD1   | NKEFA     | NKJO     | NKP30    | NKR2B4   | NKSF2   | NLRC4   | NLRP1    | NLRP12    | NLRP3     |
| NOD2     | NOS2      | NOT      | NOTCH2   | NR4A2    | NRAMP   | NRAMP1  | NT5      | NT5E      | NURR1     |
| OATP2A1  | OCTN1     | OLAH     | OPN      | OS1      | OS2     | OSM     | P62      | p90       | PAD       |
| PADI1    | PADI2     | PADI3    | PADI4    | PADI5    | PAGA    | PAR2    | PCLN1    | PDB3      | PDCD1     |
| PDGFRA   | PEP       | PFITS    | PGDH1    | PGM3     | PGT     | PHOAR1  | PHOAR2   | PIK3CG    | PIK3R1    |
| PKDCC    | PLA2B     | PLA2G2A  | PLA2G2F  | PLA2G4   | PLA2G4A | PLA2L   | PLACK    | PMGEDSV   | PPAC      |
| PPP1CB   | PPP1CC    | PPRD     | PRAAS1   | PRAAS3   | PRDX1   | PRG4    | PRKCD    | PRKM9     | PRTN3     |
| PRXI     | PSMB4     | PSMB8    | PSMB9    | PSORS1   | PSORS11 | PSORS13 | PSORS3   | PSORS4    | PSORS7    |
| PSTPIP1  | PTGS1     | PTGS2    | PTH      | PTPN2    | PTPN22  | PTPN8   | PYPAF1   | QME       | RA        |
| RC3H1    | REL       | RELB     | RETN     | RFH1     | RING10  | RING12  | RIP      | RIP1      | RIPK1     |
| RLSDF    | RORC      | RORG     | RP38     | RPEM     | RZRG    | S100A12 | S100A8   | S100A9    | SAA1      |
| SAA4     | SAP       | SAVI     | SC4MOL   | SCN2     | SELE    | SEMDBCD | SERPINH1 | SGK493    | SGP28     |
| SHORT    | SIAE      | SIFD     | SIMA135  | SLAM     | SLAMF1  | SLAMF4  | SLAT     | SLC11A1   | SLC19A1   |
| SLC21A2  | SLC22A4   | SLCO2A1  | SLEB11   | SLEB2    | SMDCF   | SP110   | SPAT     | SPDA1     | SPDA3     |
| SPP1     | SQSTM1    | SRFP3    | SRK      | SS1      | STAT1   | STAT3   | STAT4    | STEAP4    | STING1    |
| STL2     | STSL1     | SVD      | SZP      | TACE     | TAGAP   | TEK     | TFQTL2   | TFRC      | TGFB1     |
| TGFB2    | TGFB3     | THPH11   | TIL4     | TIMP1    | TIMP2   | TINUR   | TLR2     | TLR4      | TLR9      |
| TMEM173  | TNF       | TNFA     | TNFAIP3  | TNFAIP6  | TNFB    | TNFBR   | TNFR2    | TNFRSF11A | TNFRSF11B |
| TNFRSF12 | TNFRSF13C | TNFRSF1A | TNFRSF1B | TNFRSF25 | TNFRSF9 | TNFSF10 | TNFSF11  | TNFSF13   | TNFSF13B  |

|        |          |       |        |       |       |       |        |      |       |
|--------|----------|-------|--------|-------|-------|-------|--------|------|-------|
| TNFSF4 | TNFSF6   | TNIP1 | TNSALP | TNX   | TNXB  | TNXB1 | TNXB2  | TPMT | TPMTD |
| TRAF1  | TRAF3IP2 | TRAIL | TRAT1  | TREX1 | TRIM  | TRNT1 | TROP1  | TRP1 | TRPC1 |
| TTR    | UAQTL1   | UHS1  | UOX    | VCAM1 | VEGF  | VEGFA | VLA1   | VLK  | VODI  |
| VUR8   | WAF1     | WDR1  | WG     | WISP3 | YKL40 | ZAP70 | ZNF163 |      |       |

**Table S4.** The core target of *P. forrestii* Schltr. in treating rheumatoid arthritis.

| No | Shared name | Betweenness centrality | Closeness centrality | Degree | No | Shared name | Betweenness centrality | Closeness centrality | Degree |
|----|-------------|------------------------|----------------------|--------|----|-------------|------------------------|----------------------|--------|
| 1  | TNF         | 0.17134232             | 0.85714286           | 40     | 13 | MAPK14      | 0.01664739             | 0.62337662           | 19     |
| 2  | ALB         | 0.1114235              | 0.75                 | 32     | 14 | MMP3        | 0.00690046             | 0.61538462           | 19     |
| 3  | TLR4        | 0.08370965             | 0.75                 | 32     | 15 | MMP1        | 0.00539825             | 0.61538462           | 18     |
| 4  | STAT3       | 0.0803477              | 0.73846154           | 31     | 16 | NOS2        | 0.00855764             | 0.61538462           | 18     |
| 5  | MMP9        | 0.03295401             | 0.72727273           | 30     | 17 | SELE        | 0.00378772             | 0.60759494           | 18     |
| 6  | IL2         | 0.04871906             | 0.68571429           | 27     | 18 | NFKB1       | 0.00725352             | 0.6                  | 18     |
| 7  | VCAM1       | 0.02228235             | 0.68571429           | 26     | 19 | MAPK1       | 0.01195773             | 0.58536585           | 16     |
| 8  | PTGS2       | 0.05827588             | 0.68571429           | 26     | 20 | ELANE       | 0.01659297             | 0.57831325           | 16     |
| 9  | ICAM1       | 0.01126692             | 0.65753425           | 24     | 21 | ITGB2       | 0.00660598             | 0.56470588           | 15     |
| 10 | MPO         | 0.01664222             | 0.63157895           | 21     | 22 | PIK3R1      | 0.01038103             | 0.55172414           | 15     |
| 11 | MMP2        | 0.00767392             | 0.62337662           | 20     | 23 | CSF1R       | 0.00927872             | 0.57142857           | 14     |
| 12 | MAPK8       | 0.01460752             | 0.62337662           | 20     |    |             |                        |                      |        |

**Table S5.** Effective component group of *P. forrestii* Schltr. in the treatment of rheumatoid arthritis.

| Component           | Targets                                                                                       |
|---------------------|-----------------------------------------------------------------------------------------------|
| Protocatechuic acid | TTR/ALB/MMP8/TPMT/ELANE/GBA/TLR4/PTGS1/PTGS2                                                  |
| Neochlorogenic acid | MMP13/MMP2/MMP12/PRKCD/ELANE/MAPK8/PTPN22/ITGAL/PIK3CG/PTGS1/MAPK1/MMP8/MMP1/MMP9/ICAM1/ITGB2 |
| Esculetin           | TEK/MIF/NFKB1/MMP9/PTGS2                                                                      |

|                        |                                                                                                                                |
|------------------------|--------------------------------------------------------------------------------------------------------------------------------|
| Chlorogenic acid       | CA12/CA9/AKR1B1/CA1/CA14/CA2/GPR35/INSR/CDK2/BACE1/IGF1R/SRC/KDR/GSR/CA5B/MMP9/GRK6/ALOX5                                      |
| Cryptochlorogenic acid | CA12/CA9/AKR1B1/CA1/CA14/CA2/GPR35/INSR/CDK2/CSNK2A1/BACE1/ESR1/IGF1R/SRC/KDR/GSR/CA5B/CA3/MMP9/GRK6/CLK1/F2/ALOX5/TYMS/DYRK1B |
| Fraxin                 | GBA/HSPA5/MAPK1/MMP3/MMP9/MMP1/ADAM17/PTPN2/MMP13/MMP12/MMP8/IL2/TNF/SELE/MMP2                                                 |
| Magnoflorine           | MAPK14/MAPKAPK2/CSF1R/HPGD/STAT3/VCAM1/PIK3CG/MIF/MMP9/MMP2/MMP1/PDGFR/ROSC                                                    |
| Vanillin               | TTR/MMP1/PTPN22/PIK3CG/VCAM1/TPMT/MPO/MMP9/MMP2/ALPL/MMP8/MMP3/CTSL/MAPK9/MAPK1/ALB                                            |
| Fraxetin               | TEK/MMP9/PIK3CG/ELANE/CTSL/ALPL                                                                                                |
| Isochlorogenic acid A  | MMP13/MMP2/MMP12/ELANE/PRKCD/TTR/MMP1/ADAM17/MAPK1/MMP8/TNF/IL2                                                                |
| Myricitrin             | PTGS2/TNF/IL2/ABCG2/PRKCD/MPO/PIK3R1/MMP3/MMP9/PIK3CG                                                                          |
| Quercitrin             | PTGS2/TNF/IL2/ABCG2/PRKCD/MPO/PIK3R1/MMP3/PIK3CG                                                                               |
| Rutin                  | PTGS2/TNF/IL2/ABCG2/PRKCD/MPO/PIK3R1/MMP13/MMP3/MMP9/PIK3CG/MMP2                                                               |
| Isochlorogenic Acid B  | MMP12/MMP2/MMP13/ELANE/TTR/MMP1/SELE/PRKCD/MMP8/ADAMTS4/MMP9/PADI1/PADI4/MAPK8/PADI2/PADI3                                     |
| Isochlorogenic acid C  | MMP12/MMP2/MMP13/ELANE/TTR/MMP1/SELE/PRKCD/MMP8/ADAMTS4/MMP9/PADI1/PADI4/MAPK8/PADI2/PADI3                                     |
| Resveratrol            | PTGS1/PTGS2/TTR/MMP9/MMP1/MMP2/NOS2                                                                                            |
| Periplocoside          | STAT3/ROSC/F2RL1/MMP13/GBA/PRKCD/CSF1R/PTGS2/MMP8/ITGAL/MAPK14/ADAMTS4/PTPN22                                                  |

**Table S6.** KEGG enrichment results of signaling pathways in the treatment of rheumatoid arthritis with *P. forrestii* Schltr.

| Signaling pathways                                   | Count | Log10(P) | Gene names                                                                                 |
|------------------------------------------------------|-------|----------|--------------------------------------------------------------------------------------------|
| AGE-RAGE signaling pathway in diabetic complications | 13    | -14.63   | STAT3/PRKCD/MAPK14/MMP2/SELE/MAPK8/TNF/PIK3R1/MAPK1/VCAM1/MAPK9/ICAM1/NFKB1                |
| Lipid and atherosclerosis                            | 16    | -14.18   | STAT3/MAPK14/MMP9/MMP1/SELE/MAPK8/TNF/PIK3R1/MMP3/HSPA5/MAPK1/VCAM1/MAPK9/ICAM1/TLR4/NFKB1 |
| TNF signaling pathway                                | 13    | -13.87   | PTGS2/MAPK14/MMP9/SELE/MAPK8/TNF/PIK3R1/MMP3/MAPK1/VCAM1/MAPK9/ICAM1/NFKB1                 |
| IL-17 signaling pathway                              | 11    | -11.84   | MMP13/PTGS2/MAPK14/MMP9/MMP1/MAPK8/TNF/MMP3/MAPK1/MAPK9/NFKB1                              |
| C-type lectin receptor signaling pathway             | 11    | -11.35   | PRKCD/PTGS2/MAPK14/MAPK8/TNF/IL2/PIK3R1/MAPK1/MAPK9/MAPKAPK2/NFKB1                         |

|                                                 |    |        |                                                                           |
|-------------------------------------------------|----|--------|---------------------------------------------------------------------------|
| Fluid shear stress and atherosclerosis          | 12 | -11.32 | MAPK14/MMP9/MMP2/SELE/MAPK8/TNF/PIK3R1/CTSL/VCAM1/MAPK9/ICAM1/NFKB1       |
| Relaxin signaling pathway                       | 11 | -10.32 | MMP13/MAPK14/MMP9/MMP1/MMP2/NOS2/MAPK8/PIK3R1/MAPK1/MAPK9/NFKB1           |
| Chagas disease                                  | 10 | -10.00 | MAPK14/NOS2/MAPK8/TNF/IL2/PIK3R1/MAPK1/MAPK9/TLR4/NFKB1                   |
| Coronavirus disease - COVID-19                  | 13 | -9.88  | STAT3/MAPK14/MMP1/MAPK8/TNF/IL2/PIK3R1/MMP3/MAPK1/ADAM17/MAPK9/TLR4/NFKB1 |
| Pertussis                                       | 9  | -9.76  | MAPK14/NOS2/MAPK8/TNF/MAPK1/MAPK9/ITGB2/TLR4/NFKB1                        |
| Toxoplasmosis                                   | 10 | -9.59  | STAT3/MAPK14/NOS2/MAPK8/TNF/PIK3CG/MAPK1/MAPK9/TLR4/NFKB1                 |
| Rheumatoid arthritis                            | 9  | -8.96  | ITGAL/MMP1/TNF/MMP3/TEK/CTSL/ICAM1/ITGB2/TLR4                             |
| Kaposi sarcoma-associated herpesvirus infection | 11 | -8.41  | STAT3/PTGS2/MAPK14/MAPK8/PIK3R1/PIK3CG/MAPK1/MAPK9/MAPKAPK2/ICAM1/NFKB1   |
| Leishmaniasis                                   | 8  | -8.24  | PTGS2/MAPK14/NOS2/TNF/MAPK1/ITGB2/TLR4/NFKB1                              |
| Malaria                                         | 7  | -8.18  | ITGAL/SELE/TNF/VCAM1/ICAM1/ITGB2/TLR4                                     |
| Hepatitis B                                     | 10 | -8.01  | STAT3/MAPK14/MMP9/MAPK8/TNF/PIK3R1/MAPK1/MAPK9/TLR4/NFKB1                 |
| Yersinia infection                              | 9  | -7.47  | MAPK14/MAPK8/TNF/IL2/PIK3R1/MAPK1/MAPK9/TLR4/NFKB1                        |
| Neutrophil extracellular trap formation         | 10 | -7.35  | ITGAL/MAPK14/ELANE/PADI4/MPO/PIK3R1/MAPK1/ITGB2/TLR4/NFKB1                |
| Toll-like receptor signaling pathway            | 8  | -7.20  | MAPK14/MAPK8/TNF/PIK3R1/MAPK1/MAPK9/TLR4/NFKB1                            |
| T cell receptor signaling pathway               | 8  | -7.20  | MAPK14/MAPK8/TNF/IL2/PIK3R1/MAPK1/MAPK9/NFKB1                             |

---

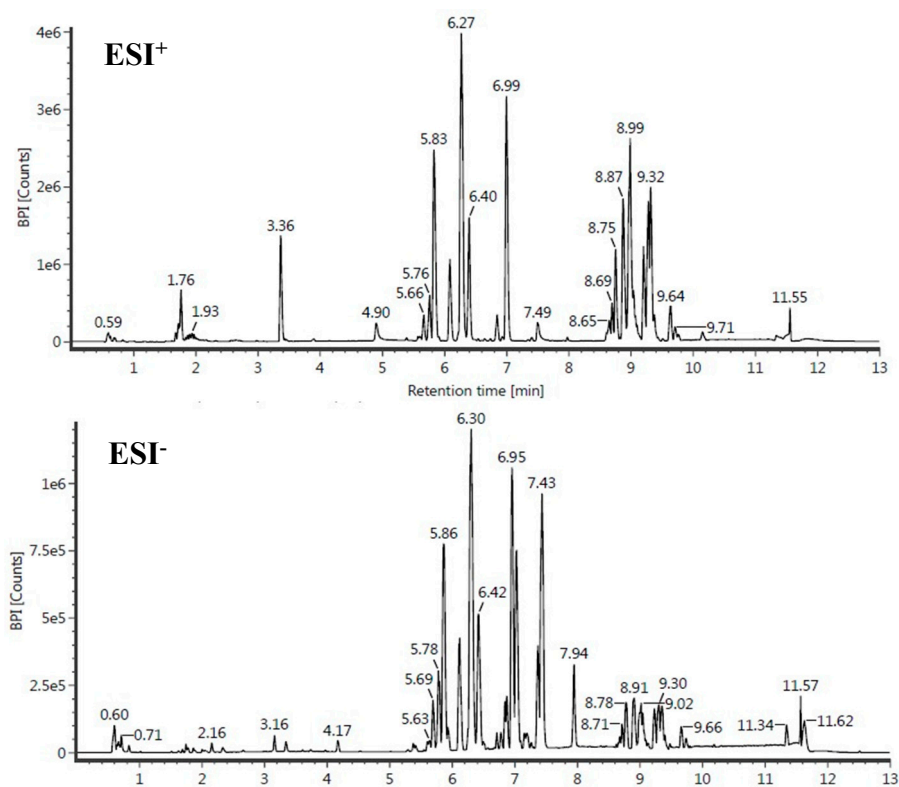

**Figure S1.** Total ion chromatogram of QC plasma samples detected by LC-MS metabolomics.

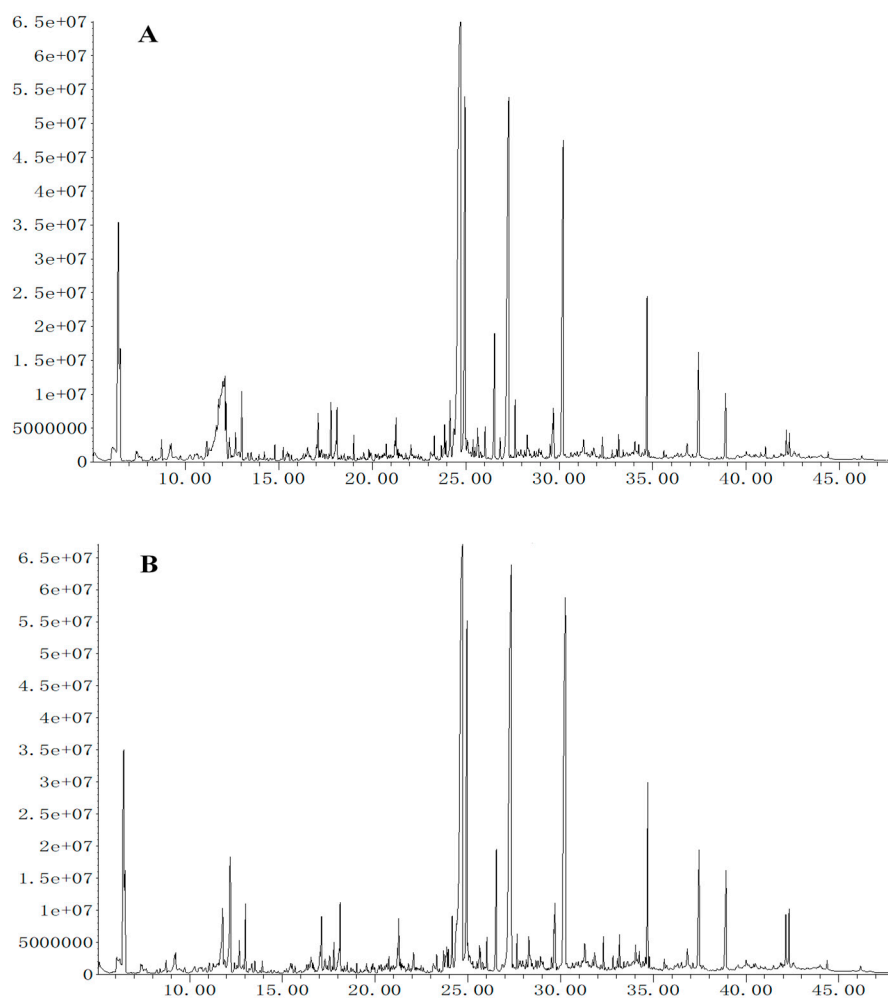

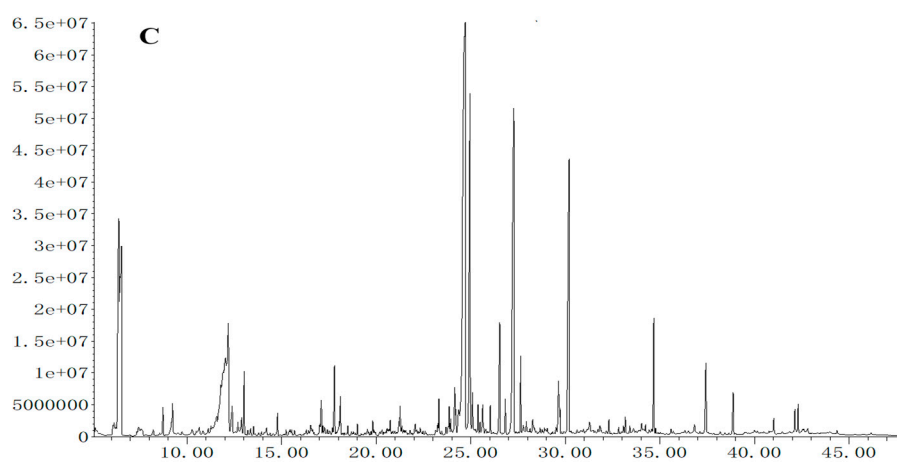

**Figure S2.** GC-MS metabolomics detection of total ion chromatogram in plasma samples; (A) CG, (B) MG, and (C) TG.

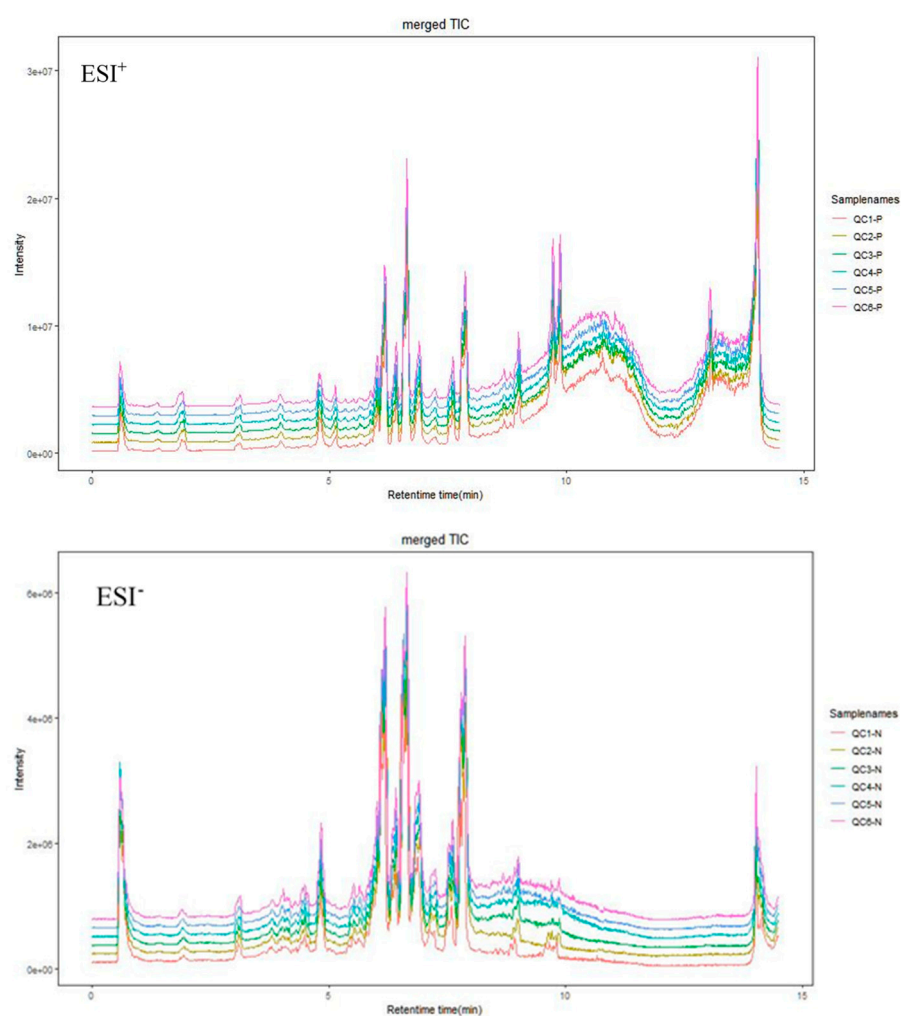

**Figure S3.** LC-MS system reproducibility study for analysis protocol based on TIC of QC plasma samples ( $n=6$ )

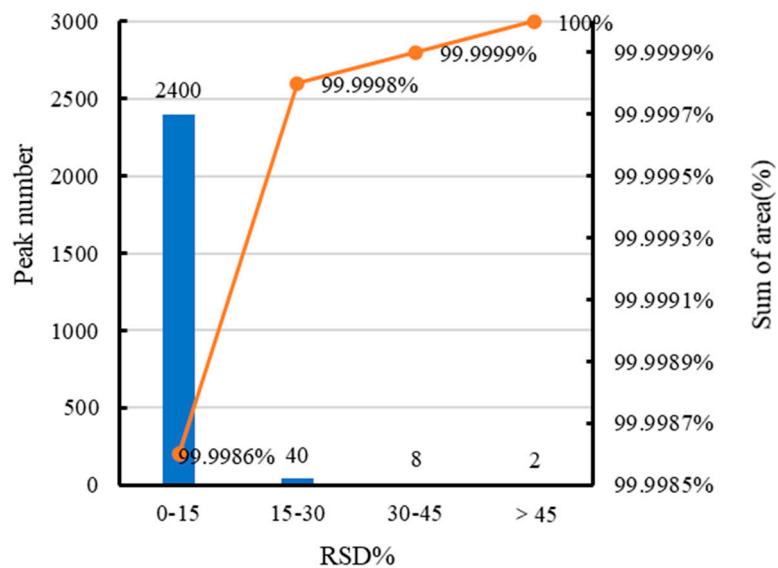

**Figure S4.** Repeatability of the metabolomics study using UPLC-Triple-TOF-MS/MS . RSD distribution plot of all metabolites in QC samples were calculated. The column represents the peak number within the specific RSD range, and the line represents the percentage of cumulative peak area within the specific RSD range, respectively.

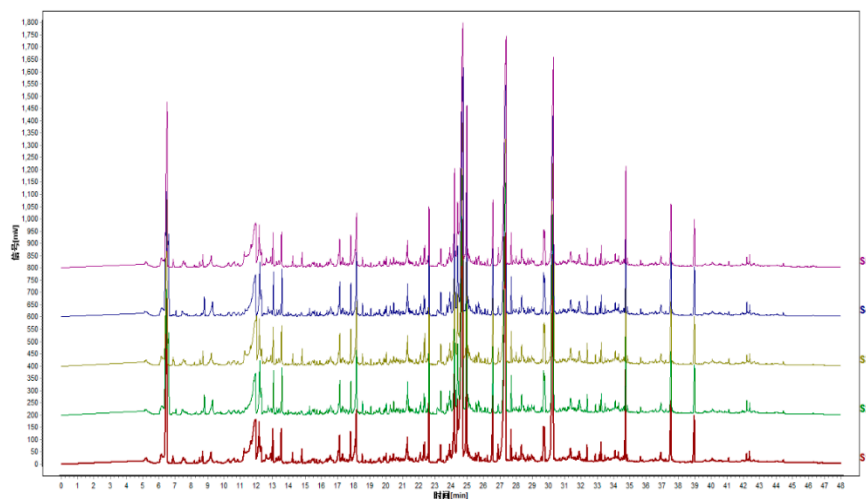

(a)

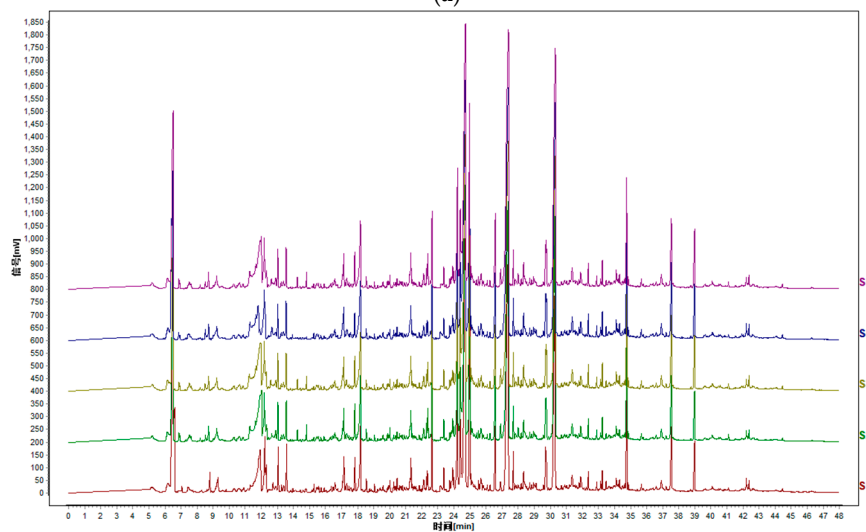

(b)

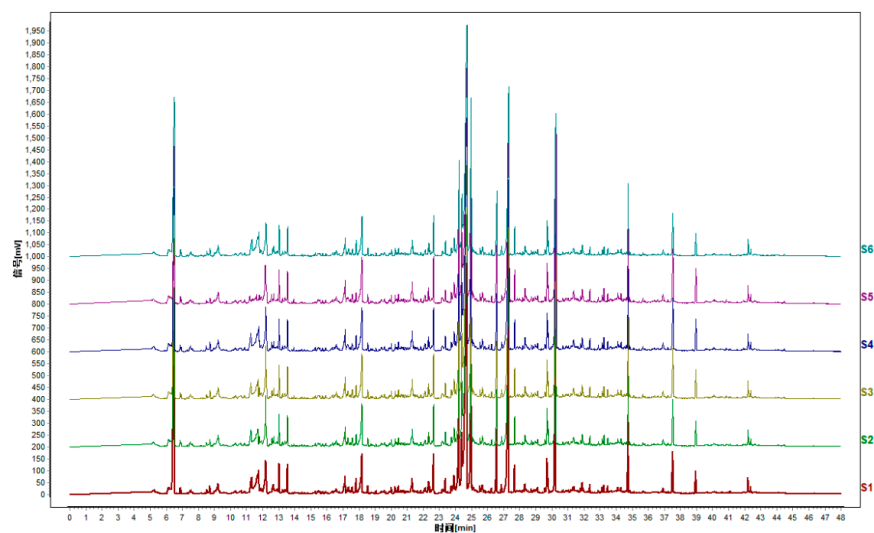

Note: S1 to S6 are the GC-MS results at 0, 2, 6, 12, 18, and 24 hours, respectively  
(c)

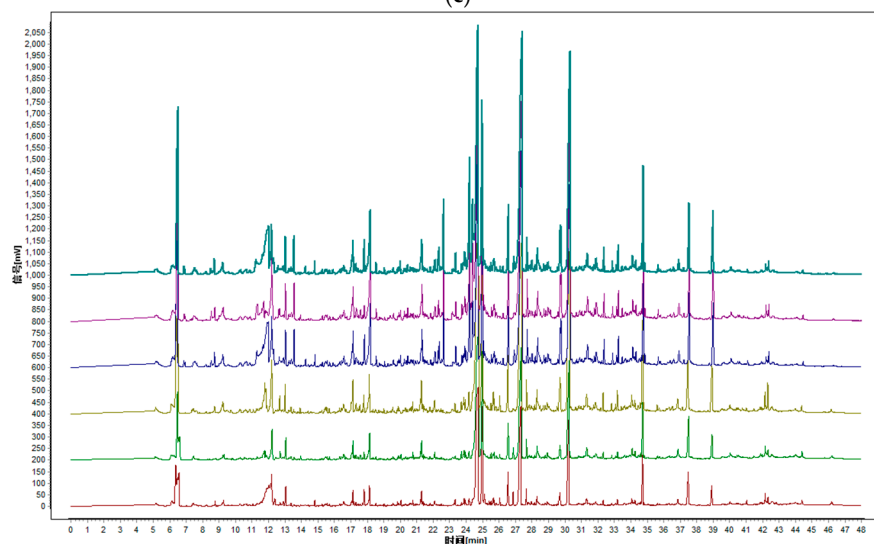

(d)

**Figure.S5** GC-MS system reproducibility study for analysis protocol based on TIC of QC plasma samples ( $n=6$ ): (a) Precision, (b) Reproducibility, (c) Stability, (d) Stability of a system.





**Table S7.** Significantly changed plasma metabolites associated with RA were detected by UPLC-Triple-TOF-MS and GC-MS.

| No    | Metabolites                            | m/z    | RT (min) | Compound ID  | Formula                                                                      | Tend | Metabolic pathway                         |
|-------|----------------------------------------|--------|----------|--------------|------------------------------------------------------------------------------|------|-------------------------------------------|
| LC 1  | Arachidonic acid                       | 303.23 | 6.14     | HMDB0001043  | C <sub>20</sub> H <sub>32</sub> O <sub>2</sub>                               | ↓    | Arachidonic acid metabolism               |
| LC 2  | DG(18:0/20:4(5Z,8Z,11Z,14Z)/0:0)       | 627.53 | 14.06    | HMDB0007170  | C <sub>41</sub> H <sub>72</sub> O <sub>5</sub>                               | ↓    | Glycerolipid metabolism                   |
| LC 3  | Chenodeoxycholic Acid                  | 393.3  | 5.52     | 207          | C <sub>24</sub> H <sub>40</sub> O <sub>4</sub>                               | ↓    | Primary bile acid biosynthesis            |
| LC 4  | Deoxycorticosterone                    | 678.47 | 9.53     | HMDB0000016  | C <sub>21</sub> H <sub>30</sub> O <sub>3</sub>                               | ↓    | Steroid hormone biosynthesis              |
| LC 5  | norcisapride                           | 625.23 | 6.55     | HMDB0061018  | C <sub>14</sub> H <sub>20</sub> C <sub>1</sub> N <sub>3</sub> O <sub>3</sub> | ↓    | unknown                                   |
| LC 6  | LysoPA(0:0/16:0)                       | 409.24 | 6.62     | HMDB0007849  | C <sub>19</sub> H <sub>39</sub> O <sub>7</sub> P                             | ↓    | Glycerophospholipid metabolism            |
| LC 7  | Leukotriene C5                         | 646.28 | 7.78     | HMDB0012993  | C <sub>30</sub> H <sub>45</sub> N <sub>3</sub> O <sub>9</sub> S              | ↓    | Arachidonic acid metabolism               |
| LC 8  | D-Lactose                              | 341.11 | 3.15     | 267          | C <sub>12</sub> H <sub>22</sub> O <sub>11</sub>                              | ↓    | Carbohydrate digestion and absorption     |
| LC 9  | Xeniasterol-a                          | 493.39 | 12.5     | LMST01031064 | C <sub>30</sub> H <sub>52</sub> O <sub>5</sub>                               | ↓    | unknown                                   |
| LC 10 | PS(12:0/15:0)                          | 648.42 | 13.89    | LMGP03010047 | C <sub>33</sub> H <sub>64</sub> NO <sub>10</sub> P                           | ↓    | Glycerophospholipid metabolism            |
| LC 11 | LysoPE(0:0/20:3(11Z,14Z,17Z))          | 502.29 | 5.74     | HMDB0011484  | C <sub>25</sub> H <sub>46</sub> NO <sub>7</sub> P                            | ↓    | Glycerophospholipid metabolism            |
| LC 12 | PG(18:3(6Z,9Z,12Z)/0:0)                | 507.27 | 8.09     | LMGP04050020 | C <sub>24</sub> H <sub>43</sub> O <sub>9</sub> P                             | ↓    | Glycerophospholipid metabolism            |
| LC 13 | Glycerophosphocholine                  | 258.11 | 6.19     | 370          | C <sub>8</sub> H <sub>20</sub> NO <sub>6</sub> P                             | ↓    | Glycerophospholipid metabolism            |
| LC 14 | Isopalmitic acid                       | 255.23 | 6.61     | 4289         | C <sub>16</sub> H <sub>32</sub> O <sub>2</sub>                               | ↓    | Biosynthesis of unsaturated fatty acids   |
| LC 15 | LysoPC(18:1(9Z))                       | 566.35 | 6.87     | HMDB0002815  | C <sub>26</sub> H <sub>52</sub> NO <sub>7</sub> P                            | ↓    | Glycerophospholipid metabolism            |
| LC 16 | Choline                                | 104.11 | 6.92     | 56           | C <sub>5</sub> H <sub>13</sub> NO                                            | ↓    | Glycine, serine, and threonine metabolism |
| LC 17 | Iso-Valeraldehyde                      | 104.11 | 6.19     | HMDB0006478  | C <sub>5</sub> H <sub>10</sub> O                                             | ↓    | Glycine, serine, and threonine metabolism |
| LC 18 | Tryptophanol                           | 184.07 | 6.02     | HMDB0003447  | C <sub>10</sub> H <sub>11</sub> NO                                           | ↓    | Tryptophan metabolism                     |
| LC 19 | Phosphocholine                         | 184.07 | 6.19     | 3318         | C <sub>5</sub> H <sub>14</sub> NO <sub>4</sub> P                             | ↓    | Glycerophospholipid metabolism            |
| LC 20 | Indoleacrylic acid                     | 188.07 | 1.87     | HMDB0000734  | C <sub>11</sub> H <sub>9</sub> NO <sub>2</sub>                               | ↓    | Linoleic acid metabolism                  |
| LC 21 | 10E,12Z-Octadecadienoic acid           | 279.23 | 6.17     | 34801        | C <sub>18</sub> H <sub>32</sub> O <sub>2</sub>                               | ↑    | Linoleic acid metabolism                  |
| LC 22 | LysoPC(18:2(9Z,12Z))                   | 520.34 | 6.19     | HMDB0010386  | C <sub>26</sub> H <sub>50</sub> NO <sub>7</sub> P                            | ↓    | Glycerophospholipid metabolism            |
| LC 23 | Linoleic acid                          | 279.23 | 8.9      | HMDB0000673  | C <sub>18</sub> H <sub>32</sub> O <sub>2</sub>                               | ↑    | alpha-Linolenic acid metabolism           |
| LC 24 | 8,11-eicosadiynoic acid                | 303.23 | 8.72     | 24087        | C <sub>20</sub> H <sub>32</sub> O <sub>2</sub>                               | ↑    | Linoleic acid metabolism                  |
| LC 25 | PE(20:2(11Z,14Z)/22:4(7Z,10Z,13Z,16Z)) | 818.57 | 14.00    | HMDB0009306  | C <sub>47</sub> H <sub>82</sub> NO <sub>8</sub> P                            | ↑    | Glycerophospholipid metabolism            |
| LC 26 | PG(a-13:0/a-13:0)                      | 677.38 | 13.03    | HMDB0116636  | C <sub>32</sub> H <sub>63</sub> O <sub>10</sub> P                            | ↑    | Glycerophospholipid metabolism            |
| LC 27 | PC(15:0/20:0)                          | 814.57 | 14.01    | HMDB0007944  | C <sub>43</sub> H <sub>86</sub> NO <sub>8</sub> P                            | ↑    | Glycerophospholipid metabolism            |
| LC 28 | PC(22:4(7Z,10Z,13Z,16Z)/P-18:1(11Z))   | 842.6  | 13.99    | HMDB0008654  | C <sub>48</sub> H <sub>86</sub> NO <sub>7</sub> P                            | ↑    | Glycerophospholipid metabolism            |
| LC 29 | PI(18:0/20:4(5Z,8Z,11Z,14Z))           | 885.55 | 14.01    | HMDB0009815  | C <sub>47</sub> H <sub>83</sub> O <sub>13</sub> P                            | ↑    | Glycerophospholipid metabolism            |

| No    | Metabolites                   | m/z    | RT (min) | Compound ID | Formula                                                         | Tend | Metabolic pathway                          |
|-------|-------------------------------|--------|----------|-------------|-----------------------------------------------------------------|------|--------------------------------------------|
| LC 30 | PI(16:0/20:4(5Z,8Z,11Z,14Z))  | 857.52 | 7.64     | HMDB0009789 | C <sub>45</sub> H <sub>79</sub> O <sub>13</sub> P               | ↑    | Glycerophospholipid metabolism             |
| LC 31 | PE(15:0/22:2(13Z,16Z))        | 802.56 | 14.01    | HMDB0008909 | C <sub>42</sub> H <sub>80</sub> NO <sub>8</sub> P               | ↑    | Glycerophospholipid metabolism             |
| LC 32 | Glucosylceramide (d18:1/16:0) | 722.55 | 12.6     | HMDB0004971 | C <sub>40</sub> H <sub>77</sub> NO <sub>8</sub>                 | ↑    | Sphingolipid metabolism                    |
| LC 33 | SM(d18:0/24:1(15Z)(OH))       | 811.67 | 14.03    | HMDB0013469 | C <sub>47</sub> H <sub>93</sub> N <sub>2</sub> O <sub>7</sub> P | ↑    | Sphingolipid metabolism                    |
| LC 34 | Lactosylceramide(d18:1/16:0)  | 844.62 | 11.06    | HMDB0006750 | C <sub>46</sub> H <sub>87</sub> NO <sub>13</sub>                | ↑    | Sphingolipid metabolism                    |
| GC 1  | Propanoic acid                | 115.0  | 6.69     | HMDB0000237 | C <sub>3</sub> H <sub>6</sub> O <sub>2</sub>                    | ↑    | Propanoate metabolism                      |
| GC 2  | (R)-3-Hydroxybutyric acid     | 73.1   | 9.49     | HMDB0000011 | C <sub>4</sub> H <sub>8</sub> O <sub>3</sub>                    | ↑    | Synthesis and degradation of ketone bodies |
| GC 3  | Estragole                     | 148.1  | 10.74    | HMDB0034121 | C <sub>10</sub> H <sub>12</sub> O                               | ↑    | unknown                                    |
| GC 4  | L-Valine                      | 73.1   | 10.85    | HMDB0000883 | C <sub>5</sub> H <sub>11</sub> NO <sub>2</sub>                  | ↑    | Valine,leucine and isoleucine biosynthesis |
| GC 5  | Butanoic acid                 | 85.1   | 11.57    | HMDB0000039 | C <sub>4</sub> H <sub>8</sub> O <sub>2</sub>                    | ↓    | Butanoate metabolism                       |
| GC 6  | Urea                          | 71.1   | 12.22    | HMDB0000294 | CH <sub>4</sub> N <sub>2</sub> O                                | ↓    | Purine metabolism                          |
| GC 7  | Glycerol                      | 131.1  | 12.36    | HMDB0000131 | C <sub>3</sub> H <sub>8</sub> O <sub>3</sub>                    | ↑    | Glycerolipid metabolism                    |
| GC 8  | Aminoethane sulfonic acid     | 91.1   | 12.56    | HMDB0000251 | H <sub>3</sub> NO <sub>3</sub> S                                | ↓    | Taurine and hypotaurine metabolism         |
| GC 9  | Glycine                       | 57.1   | 13.10    | HMDB0000123 | C <sub>2</sub> H <sub>5</sub> NO <sub>2</sub>                   | ↓    | Glycine, serine and threonine metabolism   |
| GC 10 | Butane dioic acid             | 221.1  | 13.47    | HMDB0000254 | C <sub>4</sub> H <sub>6</sub> O <sub>4</sub>                    | ↓    | Citrate cycle (TCA cycle)                  |
| GC 11 | 1,3,5-Triazine                | 191.1  | 19.69    | NA          | C <sub>3</sub> H <sub>3</sub> N <sub>3</sub>                    | ↓    | unknown                                    |
| GC 12 | L-phenylalanine               | 43.1   | 20.08    | HMDB0000159 | C <sub>9</sub> H <sub>11</sub> NO <sub>2</sub>                  | ↓    | Phenylalanine metabolism                   |
| GC 13 | D-Ribose                      | 217.1  | 20.38    | HMDB0000283 | C <sub>5</sub> H <sub>10</sub> O <sub>5</sub>                   | ↑    | Pentose phosphate pathway                  |
| GC 14 | D-(+)-Xylose                  | 217.1  | 20.95    | HMDB0000098 | C <sub>5</sub> H <sub>10</sub> O <sub>5</sub>                   | ↑    | Pentose and glucuronate interconversions   |
| GC 15 | Hentriacontane                | 111.1  | 21.48    | HMDB0030092 | C <sub>31</sub> H <sub>64</sub>                                 | ↓    | Unknown                                    |
| GC 16 | DL-Ornithine                  | 142.1  | 23.47    | HMDB32455   | C <sub>5</sub> H <sub>12</sub> N <sub>2</sub> O <sub>2</sub>    | ↑    | Unknown                                    |
| GC 17 | 1,5-Anhydro-D-sorbitol        | 258.2  | 24.04    | HMDB0002712 | C <sub>6</sub> H <sub>12</sub> O <sub>5</sub>                   | ↑    | Unknown                                    |
| GC 18 | D-Fructose                    | 70.1   | 24.36    | HMDB0000660 | C <sub>6</sub> H <sub>12</sub> O <sub>6</sub>                   | ↓    | Galactose metabolism                       |
| GC 19 | d-Mannose                     | 220.1  | 24.9     | HMDB0000169 | C <sub>6</sub> H <sub>12</sub> O <sub>6</sub>                   | ↑    | Fructose and mannose metabolism            |
| GC 20 | d-Glucose                     | 113.1  | 25.2     | HMDB0000122 | C <sub>6</sub> H <sub>12</sub> O <sub>6</sub>                   | ↓    | Starch and sucrose metabolism              |
| GC 21 | L-Lysine                      | 56.1   | 25.28    | HMDB0000182 | C <sub>6</sub> H <sub>14</sub> N <sub>2</sub> O <sub>2</sub>    | ↓    | Lysine degradation                         |
| GC 22 | Myo-Inositol                  | 265.1  | 27.86    | HMDB0000211 | C <sub>6</sub> H <sub>12</sub> O <sub>6</sub>                   | ↓    | Inositol phosphate metabolism              |
| GC 23 | Heptacosane                   | 57.1   | 29.15    | NA          | C <sub>27</sub> H <sub>56</sub>                                 | ↓    | Unknown                                    |
| GC 24 | 9,12-Octadecadienoic acid     | 144.1  | 29.90    | HMDB0000673 | C <sub>18</sub> H <sub>32</sub> O <sub>2</sub>                  | ↑    | Linoleic acid metabolism                   |
| GC 25 | Oleic acid                    | 160.1  | 29.91    | HMDB0000207 | C <sub>18</sub> H <sub>34</sub> O <sub>2</sub>                  | ↑    | Biosynthesis of unsaturated fatty acids    |
| GC 26 | Arachidonic acid              | 41.1   | 32.08    | HMDB0001043 | C <sub>20</sub> H <sub>32</sub> O <sub>2</sub>                  | ↓    | Arachidonic acid metabolism                |

| No    | Metabolites       | m/z   | RT (min) | Compound ID | Formula                                        | Tend | Metabolic pathway                       |
|-------|-------------------|-------|----------|-------------|------------------------------------------------|------|-----------------------------------------|
| GC 27 | Eicosanoic acid   | 369.4 | 33.06    | HMDB0002212 | C <sub>20</sub> H <sub>40</sub> O <sub>2</sub> | ↑    | Biosynthesis of unsaturated fatty acids |
| GC 28 | Hexadecanoic acid | 70.1  | 34.91    | HMDB0000220 | C <sub>16</sub> H <sub>32</sub> O <sub>2</sub> | ↓    | Biosynthesis of unsaturated fatty acids |
| GC 29 | Tetracosane       | 43.1  | 36.60    | NA          | C <sub>24</sub> H <sub>50</sub>                | ↓    | Unknown                                 |
| GC 30 | Octadecanoic acid | 97.1  | 37.79    | HMDB0000827 | C <sub>18</sub> H <sub>36</sub> O <sub>2</sub> | ↑    | Biosynthesis of unsaturated fatty acids |
| GC 31 | Octadecane        | 99.1  | 38.22    | HMDB0033721 | C <sub>18</sub> H <sub>38</sub>                | ↓    | Unknown                                 |
| GC 32 | Triacontane       | 113.1 | 40.94    | NA          | C <sub>30</sub> H <sub>62</sub>                | ↓    | Unknown                                 |

\* "↓" or "↑" means the metabolite significantly decreased or increased in AA Model group compared with control group.

**Table S8.** Main metabolic pathways related to RA according to MS analyses and MetaboAnalyst database.

| No    | Pathways                                               | Total | Expected | Hits | Raw p    | Holm adjust | FDR      | Impact | Details |
|-------|--------------------------------------------------------|-------|----------|------|----------|-------------|----------|--------|---------|
| LC 1  | Glycerophospholipid metabolism                         | 36    | 0.4413   | 7    | 8.19E-08 | 6.88E-06    | 6.88E-06 | 0.4395 | KEGG    |
| LC 2  | Linoleic acid metabolism                               | 5     | 0.0613   | 2    | 0.0014   | 0.1157      | 0.0506   | 1      | KEGG    |
| LC 3  | Sphingolipid metabolism                                | 21    | 0.2574   | 3    | 0.0018   | 0.1483      | 0.0506   | 0.0385 | KEGG    |
| LC 4  | Biosynthesis of unsaturated fatty acids                | 36    | 0.4413   | 2    | 0.0700   | 1           | 1        | 0      | KEGG    |
| LC 5  | Arachidonic acid metabolism                            | 36    | 0.4413   | 2    | 0.0700   | 1           | 1        | 0.3135 | KEGG    |
| LC 6  | alpha-Linolenic acid metabolism                        | 13    | 0.1594   | 1    | 0.1487   | 1           | 1        | 0      | KEGG    |
| LC 7  | Glycosylphosphatidylinositol (GPI)-anchor biosynthesis | 14    | 0.1716   | 1    | 0.1592   | 1           | 1        | 0.0040 | KEGG    |
| LC 8  | Glycerolipid metabolism                                | 16    | 0.1961   | 1    | 0.1799   | 1           | 1        | 0.0125 | KEGG    |
| LC 9  | Ether lipid metabolism                                 | 20    | 0.2452   | 1    | 0.2198   | 1           | 1        | 0      | KEGG    |
| LC 10 | Phosphatidylinositol signaling system                  | 28    | 0.3432   | 1    | 0.2942   | 1           | 1        | 0.0015 | KEGG    |
| LC 11 | Glycine, serine and threonine metabolism               | 33    | 0.4045   | 1    | 0.3372   | 1           | 1        | 0      | KEGG    |
| LC 12 | Primary bile acid biosynthesis                         | 46    | 0.5639   | 1    | 0.4378   | 1           | 1        | 0      | KEGG    |
| LC 13 | Steroid hormone biosynthesis                           | 85    | 1.0419   | 1    | 0.6597   | 1           | 1        | 0.0221 | KEGG    |
| GC 1  | Linoleic acid metabolism                               | 5     | 0.0871   | 1    | 0.0842   | 1           | 0.8843   | 1      | KEGG    |
| GC 2  | Phenylalanine, tyrosine and tryptophan biosynthesis    | 4     | 0.0697   | 1    | 0.0679   | 1           | 0.8843   | 0.5    | KEGG    |
| GC 3  | Taurine and hypotaurine metabolism                     | 8     | 0.1394   | 1    | 0.1314   | 1           | 1        | 0.4286 | KEGG    |
| GC 4  | Phenylalanine metabolism                               | 10    | 0.1742   | 1    | 0.1616   | 1           | 1        | 0.3571 | KEGG    |
| GC 5  | Arachidonic acid metabolism                            | 36    | 0.6271   | 1    | 0.4727   | 1           | 1        | 0.3135 | KEGG    |
| GC 6  | Glycine, serine, and threonine metabolism              | 33    | 0.5748   | 1    | 0.4435   | 1           | 1        | 0.2458 | KEGG    |
| GC 7  | Glycerolipid metabolism                                | 16    | 0.2787   | 1    | 0.2461   | 1           | 1        | 0.2368 | KEGG    |
| GC 8  | Inositol phosphate metabolism                          | 30    | 0.5226   | 1    | 0.4127   | 1           | 1        | 0.1294 | KEGG    |
| GC 9  | Glyoxylate and dicarboxylate metabolism                | 32    | 0.5574   | 1    | 0.4334   | 1           | 1        | 0.1058 | KEGG    |
| GC 10 | Glutathione metabolism                                 | 28    | 0.4877   | 1    | 0.3913   | 1           | 1        | 0.0887 | KEGG    |
| GC 11 | Pentose and glucuronate interconversions               | 18    | 0.3136   | 1    | 0.2725   | 1           | 1        | 0.0781 | KEGG    |
| GC 12 | Phosphatidylinositol signaling system                  | 28    | 0.4877   | 1    | 0.3913   | 1           | 1        | 0.0374 | KEGG    |
| GC 13 | Citrate cycle (TCA cycle)                              | 20    | 0.3484   | 1    | 0.2979   | 1           | 1        | 0.0327 | KEGG    |
| GC 14 | Primary bile acid biosynthesis                         | 46    | 0.8013   | 2    | 0.1898   | 1           | 1        | 0.0152 | KEGG    |
| GC 15 | Fatty acid biosynthesis                                | 47    | 0.8187   | 1    | 0.5677   | 1           | 1        | 0.0147 | KEGG    |
| GC 16 | Glycolysis/Gluconeogenesis                             | 26    | 0.4529   | 1    | 0.3691   | 1           | 1        | 0.0102 | KEGG    |

Note: The “total” is the total number of compounds in the pathway; The “hits” is the actual number of matches in the user's uploaded data; “Raw p” is the original p-value calculated through enrichment analysis; “Holm adjust” is the p-value adjusted through the Holm Bonferroni method; “FDR” is the error detection rate; “Impact” is the path impact value calculated based on path topology analysis.
